# Supplementary material
Source: bioRxiv or medRxiv preprint supplement (http://biorxiv.org/highwire/filestream/57098/field_highwire_adjunct_files/0/145987-1.pdf)
Supplement: Supplementary file [file 145987-1.pdf]

1                                    **Supplementary Material for:**  
2                    **The consequences of polyandry for sibship structures, distributions of**  
3                    **relationships and relatedness, and potential for inbreeding in a wild**  
4                                    **population**

5  
6  
7    ***Supporting Information S1. Quantifying the combined effects of simultaneous and***  
8    ***sequential polyandry on sibship structures***

9  
10 We fitted generalized linear models (GLMs) with binomial error structures (where  $N_{\text{sibs}}$   
11 represents the binomial denominator) to test whether  $\text{Diff}_{\text{social-gen}}$  (i.e., the absolute  
12 difference between each female's value of  $\text{Prop}_{\text{Full-sibs}}$  given the social and genetic pedigrees)  
13 or  $\text{Diff}_{\text{life\_monandry-gen}}$  (the difference between  $\text{Prop}_{\text{Full-sibs}}$  given the genetic pedigree versus the  
14 expectation given strict lifelong monandry) varied with whether or not any of a female's  
15 lifetime offspring were sired by an extra-pair male (i.e., a two-level factor), or alternatively  
16 by the overall proportion of a female's lifetime offspring that were sired by extra-pair males.  
17 Linear and quadratic effects of the latter variable were fitted since low  $\text{Diff}_{\text{social-gen}}$  and  
18  $\text{Diff}_{\text{life\_monandry-gen}}$  could occur if a small proportion of a female's offspring were sired by  
19 extra-pair males or if a large proportion of offspring were sired by the same extra-pair male.

20         As expected,  $\text{Diff}_{\text{social-gen}}$  varied with whether or not a female produced any banded  
21 extra-pair offspring, with a raw mean difference of  $0.32 \pm 0.30$  (median 0.2, range 0.00–1.00)  
22 for females that produced at least one extra-pair offspring compared to zero for females  
23 that did not (table S1).  $\text{Diff}_{\text{social-gen}}$  also varied with the total proportion of a female's banded

24 offspring sired by extra-pair males, and increased up to intermediate proportions of extra-  
25 pair banded offspring but decreased with higher proportions (table S1; *Results* fig. 3A).

26  $\text{Diff}_{\text{life\_monandry-gen}}$  was likewise predicted by whether or not a female produced any banded  
27 extra-pair offspring, with means of  $0.63 \pm 0.23$  (median 0.7, range 0–1.00) and  $0.11 \pm 0.22$   
28 (median 0, range 0–0.71) for females that did and did not produce any extra-pair offspring  
29 respectively (table S1).  $\text{Diff}_{\text{life\_monandry-gen}}$  increased up to intermediate proportions of extra-  
30 pair banded offspring but decreased with higher proportions (table S1; *Results* fig. 3B).

31 Similar to sibships among banded offspring,  $\text{Diff}_{\text{social-gen}}$  for recruited offspring varied  
32 with whether or not a female produced any extra-pair recruited offspring, with a raw mean  
33 difference of  $0.33 \pm 0.30$  (median 0.26, range 0.00–1.00) for females that produced at least  
34 one extra-pair recruited offspring compared to zero for females that did not (table S1).

35  $\text{Diff}_{\text{social-gen}}$  increased up to intermediate proportions of extra-pair recruits and again  
36 decreased with higher proportions (table S1; *Results* fig. 3C).  $\text{Diff}_{\text{life\_monandry-gen}}$  was likewise  
37 predicted by whether or not a female produced any extra-pair recruited offspring, with  
38 means of  $0.65 \pm 0.30$  (median 0.7, range 0–1.00) and  $0.29 \pm 0.40$  (median 0, range 0–1.00) for  
39 females that did and did not produce any extra-pair recruited offspring, respectively (table  
40 S1).  $\text{Diff}_{\text{life\_monandry-gen}}$  also increased up to intermediate proportions of extra-pair recruited  
41 offspring, but decreased with higher proportions (table S1; *Results* fig. 3D).

42 **Table S1:** Generalized linear models estimating whether changes in sibship structure of  
43 females' banded (A–D) and recruited (E–H) offspring given the genetic versus social  
44 pedigrees ( $\text{Diff}_{\text{social-gen}}$ ), and given the genetic pedigree versus strict lifelong monandry  
45 ( $\text{Diff}_{\text{life\_monandry-gen}}$ ), varied in relation to whether or not females produced any extra-pair  
46 offspring over their lifetime (Any EPO; Models A,C,E,G), or with the proportion of a female's  
47 lifetime offspring that were extra-pair offspring (Prop EPO; Models B, D,F,H). All models  
48 utilized a binomial error structure weighted by total number of sibships ( $N_{\text{sibs}}$ ). Linear and  
49 quadratic effects of Prop EPO were modelled. Estimated effects of extra-pair reproduction  
50 (on latent scales) are presented  $\pm 1$  standard error (SE),  $df$  is the residual degrees of  
51 freedom,  $R^2$  is the coefficient of determination.

52 **Table S1**

| <b>Response variable</b>             | <b>df</b> | <b>R<sup>2</sup></b> | <b>Predictor</b>        | <b>Estimate (±SE)</b> | <b>Z</b> | <b>p</b> |
|--------------------------------------|-----------|----------------------|-------------------------|-----------------------|----------|----------|
| <b>Banded offspring</b>              |           |                      |                         |                       |          |          |
| A) Diff <sub>social-gen</sub>        | 96        | 0.04                 | Intercept               | -0.96 (0.10)          |          |          |
|                                      |           |                      | Any EPO                 | 0.38 (0.10)           | 3.6      | 0.0002   |
| B) Diff <sub>social-gen</sub>        | 95        | 0.14                 | Intercept               | -2.20 (0.04)          |          |          |
|                                      |           |                      | Prop EPO                | 4.90 (0.41)           | 11.93    | <0.0001  |
|                                      |           |                      | (Prop EPO) <sup>2</sup> | -3.23 (0.57)          | -5.65    | <0.0001  |
| C) Diff <sub>life_monandry-gen</sub> | 96        | 0.29                 | Intercept               | -1.73 (0.12)          |          |          |
|                                      |           |                      | Any EPO                 | 2.64 (0.12)           | 21.2     | <0.0001  |
| D) Diff <sub>life_monandry-gen</sub> | 95        | 0.25                 | Intercept               | 0.59 (0.03)           |          |          |
|                                      |           |                      | Prop EPO                | 4.04 (0.32)           | 12.64    | <0.0001  |
|                                      |           |                      | (Prop EPO) <sup>2</sup> | -6.73 (0.39)          | 17.5     | <0.0001  |
| <b>Recruited offspring</b>           |           |                      |                         |                       |          |          |
| E) Diff <sub>social-gen</sub>        | 35        | 0.25                 | Intercept               | -1.66 (0.30)          |          |          |
|                                      |           |                      | Any EPO                 | 1.07 (0.32)           | 3.4      | 0.0008   |
| F) Diff <sub>social-gen</sub>        | 34        | 0.37                 | Intercept               | -1.37 (0.17)          |          |          |
|                                      |           |                      | Prop EPO                | 4.88 (1.21)           | 4.04     | <0.0001  |
|                                      |           |                      | (Prop EPO) <sup>2</sup> | -2.49 (1.09)          | -2.47    | 0.01     |
| G) Diff <sub>life_monandry-gen</sub> | 35        | 0.34                 | Intercept               | -0.81 (0.24)          |          |          |
|                                      |           |                      | Any EPO                 | 1.56 (0.26)           | 6.0      | <0.0001  |
| H) Diff <sub>life_monandry-gen</sub> | 34        | 0.50                 | Intercept               | 0.29 (0.14)           |          |          |
|                                      |           |                      | Prop EPO                | 2.77 (1.14)           | 2.43     | 0.02     |
|                                      |           |                      | (Prop EPO) <sup>2</sup> | -4.56 (0.83)          | 5.47     | <0.0001  |

54 **Supporting Information S2. Sibship structure among banded offspring of females that**  
55 **produced recruits**

56

57 We quantified whether differences between females' banded and recruited offspring for  
58 both the number of male sires and proportion of full-sibships ( $\text{Prop}_{\text{Full-sibs}}$ ) across pedigrees  
59 (*Results*, table 1; fig. 2) were consistent across the exact same females over different  
60 offspring life-stages, rather than an artefact of the reduced sample size of females for  
61 analyses of recruits. To do so, we conducted further analysis of sibship structures among  
62 banded offspring of the 37 females that had at least two recruited offspring (see main  
63 manuscript *Methods, Sibship structure*).

64 Results from the subset of 37 females were quantitatively similar to those from the  
65 full dataset of 98 females, in that the number of different males that sired each female's  
66 banded offspring was greater given the genetic pedigree than given the social pedigree, but  
67 did not differ significantly between the genetic pedigree and the 'distinct males' pedigree  
68 (*Results*, table 1). Mean  $\text{Prop}_{\text{Full-sibs}}$  among females' banded offspring was greater given the  
69 social versus genetic pedigrees, which was in turn greater than given the 'distinct males'  
70 pedigree (*Results*, table 1).  $\text{Prop}_{\text{Full-sibs}}$  among the banded offspring of most (81%; 30/37)  
71 females was lower given the genetic versus social pedigrees, for 14% (5/37) of females there  
72 was no change in lifetime sibships among banded offspring between the pedigrees, and  
73 0.5% (2/37) of females had greater  $\text{Prop}_{\text{Full-sibs}}$  among banded offspring given the genetic  
74 pedigree than given the social pedigree. Most females (57%; 21/37) had even lower  $\text{Prop}_{\text{Full-}}$   
75  $\text{sibs}$  given the 'distinct males' pedigree than given the genetic pedigree, whereas 43% (16/37)

76 of females had no change between the two pedigrees, and no females had greater  $\text{Prop}_{\text{Full-sibs}}$   
77  $\text{sibs}$  given the 'distinct males' pedigree (fig. S1).

78 Thus, results reported in the main manuscript (*Results*, table 1) regarding the lack of  
79 change in mean  $\text{Prop}_{\text{Full-sibs}}$  given the 'distinct males' pedigree compared to the genetic  
80 pedigree, as well as the lack of difference in mean number of male sires among all three  
81 pedigrees for recruited offspring are likely not an artefact of the relatively small sample size  
82 for recruit sibship structures. Rather, these differences in sibship structures among banded  
83 and recruited offspring may be due to differential survival among within-pair (i.e., sired by  
84 social male) offspring versus their extra-pair brood-mates, as found previously in song  
85 sparrows (Sardell et al. 2011). These results suggest that the ultimate consequences of  
86 polyandry for the potential for different degrees of inbreeding and consequent fitness  
87 among descendants of polyandrous females in natural populations, with natural levels of  
88 offspring mortality, could be smaller than expected from laboratory populations (e.g.,  
89 Power and Holman 2014).

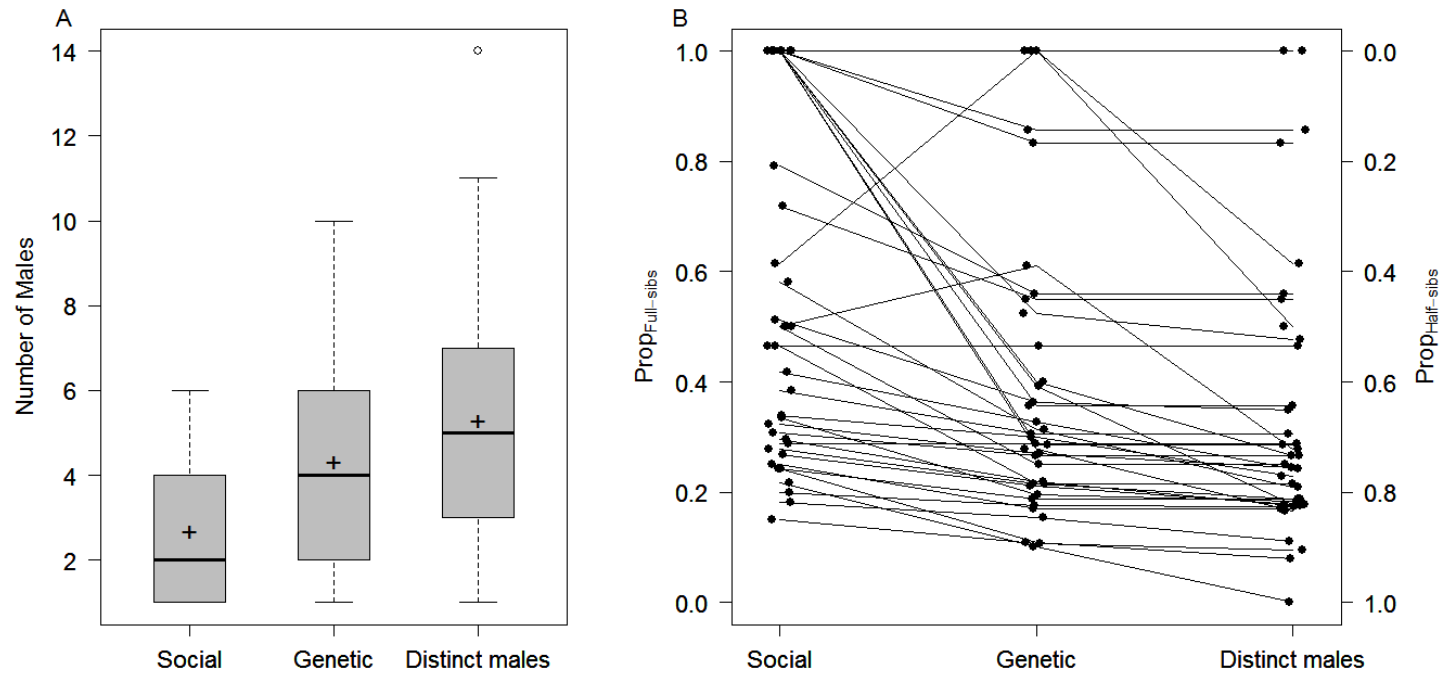

90

91 **Figure S1:** The (A) numbers of different males that sired offspring, and (B) sibship structures of females' banded offspring given the social  
 92 pedigree ('Social'), genetic pedigree ('Genetic'), and given the 'distinct males' pedigree ('Distinct males') using a restricted dataset of 37  
 93 females that produced >1 recruited offspring. In (A), box lines represent the median, upper and lower quartiles, whiskers demarcate 1.5× the  
 94 interquartile range, and '+' shows the mean. In (B) the left and right axes respectively show the proportions of sibships among each female's  
 95 offspring that are full-siblings (Prop<sub>Full-sibs</sub>) and half-siblings (Prop<sub>Half-sibs</sub>), where points denote individual females (jittered for clarity), and lines  
 96 join observations for individual females given the three pedigrees.

97            Unlike our main analyses involving all females which produced >1 banded offspring,  
98  $\text{Diff}_{\text{social-gen}}$  did not vary with whether or not a female produced any banded extra-pair  
99 offspring, with a raw mean of  $0.21 \pm 0.22$  (median 0.13, range 0.00–0.72) for females that  
100 produced at least one extra-pair offspring compared to zero for females that did not (table  
101 S2). However, similar to our main analyses,  $\text{Diff}_{\text{social-gen}}$  varied with the proportion of a  
102 female's total banded offspring that were sired by extra-pair males, showing that  $\text{Diff}_{\text{social-gen}}$   
103 increased significantly with intermediate proportions of extra pair offspring (linear slope,  
104 table S2), but tended to decrease with higher proportions, though this later relationship was  
105 not significant (quadratic slope, table S2).  $\text{Diff}_{\text{life\_monandry-gen}}$  likewise varied with whether or  
106 not a female produced any banded extra-pair offspring, with means of  $0.63 \pm 0.25$  (median  
107 0.7, range 0–0.90) and  $0.31 \pm 0.37$  (median 0.3, range 0–0.71) for females that did and did  
108 not produce any extra-pair offspring respectively.  $\text{Diff}_{\text{life\_monandry-gen}}$  also varied with the  
109 proportion of a female's total banded offspring that were sired by extra-pair males, where  
110  $\text{Diff}_{\text{life\_monandry-gen}}$  increased with up to intermediate proportions of extra-pair offspring  
111 (linear slope, table S2) but once again decreased with higher proportions (quadratic slope,  
112 table S2).



113 **Table S2:** Generalized linear models estimating whether changes in sibship structure of  
114 females' banded offspring given the genetic versus social pedigrees ( $\text{Diff}_{\text{social-gen}}$ ), and given  
115 the genetic pedigree versus strict lifelong monandry ( $\text{Diff}_{\text{lifelong-monandry-gen}}$ ) varied in relation to  
116 whether or not females produced any extra-pair offspring over their lifetime (Any EPO;  
117 Models A,C,E,G), or in relation to linear or quadratic effects of the proportion of a female's  
118 lifetime offspring that were extra-pair offspring (Prop EPO; Models B, D,F,H). Models A–D  
119 are from the full female dataset (reproduced from table S1 for comparison), and models E–  
120 H utilise a restricted dataset considering the banded offspring of females that produced at  
121 least two recruited offspring. All models utilized a binomial error structure weighted by total  
122 number of sibships ( $N_{\text{sibs}}$ ), and  $\text{Diff}_{\text{social-gen}}$  was range scaled 0–1. Estimated effects of extra-  
123 pair reproduction (on latent scales) are presented  $\pm 1$  standard error (SE),  $df$  is the residual  
124 degrees of freedom,  $R^2$  is the coefficient of determination.

125 **Table S2**

| <b>Response variable</b>                     | <b>df</b> | <b>R<sup>2</sup></b> | <b>Predictor</b>        | <b>Estimate (±SE)</b> | <b>Z</b> | <b>p</b> |
|----------------------------------------------|-----------|----------------------|-------------------------|-----------------------|----------|----------|
| <b>Banded offspring – Full dataset</b>       |           |                      |                         |                       |          |          |
| A) Diff <sub>social-gen</sub>                | 96        | 0.04                 | Intercept               | -0.96 (0.10)          |          |          |
|                                              |           |                      | Any EPO                 | 0.38 (0.10)           | 3.6      | 0.0002   |
| B) Diff <sub>social-gen</sub>                | 95        | 0.14                 | Intercept               | -2.20 (0.04)          |          |          |
|                                              |           |                      | Prop EPO                | 4.90 (0.41)           | 11.93    | <0.0001  |
|                                              |           |                      | (Prop EPO) <sup>2</sup> | -3.23 (0.57)          | -5.65    | <0.0001  |
| C) Diff <sub>life_monandry-gen</sub>         | 96        | 0.29                 | Intercept               | -1.73 (0.12)          |          |          |
|                                              |           |                      | Any EPO                 | 2.64 (0.12)           | 21.2     | <0.0001  |
| D) Diff <sub>life_monandry-gen</sub>         | 95        | 0.25                 | Intercept               | 0.59 (0.03)           |          |          |
|                                              |           |                      | Prop EPO                | 4.04 (0.32)           | 12.64    | <0.0001  |
|                                              |           |                      | (Prop EPO) <sup>2</sup> | -6.73 (0.39)          | 17.5     | <0.0001  |
| <b>Banded offspring – Restricted dataset</b> |           |                      |                         |                       |          |          |
| E) Diff <sub>social-gen</sub>                | 35        | 0.01                 | Intercept               | -0.63 (0.23)          |          |          |
|                                              |           |                      | Any EPO                 | 0.37 (0.23)           | 1.6      | 0.11     |
| F) Diff <sub>social-gen</sub>                | 34        | 0.12                 | Intercept               | -2.04 (0.04)          |          |          |
|                                              |           |                      | Prop EPO                | 2.61 (0.29)           | 8.97     | <0.0001  |
|                                              |           |                      | (Prop EPO) <sup>2</sup> | 0.16 (0.37)           | 0.45     | 0.66     |
| G) Diff <sub>life_monandry-gen</sub>         | 35        | 0.01                 | Intercept               | 0.30 (0.22)           |          |          |
|                                              |           |                      | Any EPO                 | 0.63 (0.23)           | 2.8      | 0.005    |
| H) Diff <sub>life_monandry-gen</sub>         | 34        | 0.14                 | Intercept               | 0.96 (0.03)           |          |          |
|                                              |           |                      | Prop EPO                | 1.63 (0.27)           | 6.03     | <0.0001  |
|                                              |           |                      | (Prop EPO) <sup>2</sup> | -2.06 (0.28)          | 7.43     | <0.0001  |

127 **Supporting Information S3. Sibship structure among males' banded and recruited offspring**

128

129 Analyses of sibship structure among lifetime banded and recruited offspring of male song  
130 sparrows given the social and genetic pedigrees were implemented as for females  
131 (described in *Methods*). However the 'distinct males' pedigree is arbitrary for males, and so  
132 was not analyzed.

133 A total of 99 males produced at least two banded offspring (i.e., at least one  
134 offspring sibship) given both the social and genetic pedigrees (males with >1 offspring under  
135 one pedigree but  $\leq 1$  under the other were excluded from analyses). These males socially  
136 reared a mean of  $10.9 \pm 8.4$  offspring (median 8, range 2–44) and sired a mean of  $11.3 \pm 9.5$   
137 genetic offspring (median 8, range 2–52). Both the number of females with which males  
138 produced banded offspring and  $\text{Prop}_{\text{Full-sibs}}$  among banded offspring were greater given the  
139 genetic versus social pedigrees (table S3; fig. S2A,B). Similar to females, most males (62%,  
140 62/99) had fewer full-sibships among lifetime banded offspring given the genetic versus  
141 social pedigree, whereas 30% (30/99) males had no change in  $\text{Prop}_{\text{Full-sibs}}$  between the  
142 pedigrees, and 7% (7/99) of males had greater  $\text{Prop}_{\text{Full-sibs}}$  given the genetic pedigree.

143 A total of 31 male song sparrows produced at least two recruited offspring under  
144 both the social and genetic pedigrees, with means of  $4.4 \pm 2.9$  social offspring (median 3,  
145 range 2–16) produced and  $4.7 \pm 3.3$  genetic offspring sired (median 3, range 2–17) over their  
146 lifetimes. While  $\text{Prop}_{\text{Full-sibs}}$  among males' recruits was greater given the genetic than given  
147 the social pedigree, the number of females with which males produced recruited offspring  
148 did not significantly differ between the two pedigrees (table S3; fig. S2C,D). Once again  
149 similar to females, 39% (12/31) of males had fewer full-sibships among their lifetime

150 recruited offspring given the genetic pedigree than given the social pedigree, while 52%

151 (16/31) had no change, and 10% (3/31) had greater  $\text{Prop}_{\text{Full-sibs}}$  given the genetic pedigree.

152 **Table S3:** Summary statistics (left panel) and generalized linear mixed models (right panel)  
153 estimating differences in the number of females with which a male sired (A) banded and (C)  
154 recruited offspring, and the proportion of full-sibships ( $\text{Prop}_{\text{Full-sibs}}$ ) among males' (B) banded  
155 and (D) recruited offspring given the social and genetic pedigrees. Analyses include 99 and  
156 31 males for analyses of banded and recruited offspring, respectively, and assumed (A and  
157 C) Poisson or (B and D) binomial error structures. Raw means are presented  $\pm 1$  standard  
158 deviation (SD). Estimated effects of pedigree are presented  $\pm 1$  standard error (SE),  $df$  is the  
159 residual degrees of freedom (where the social pedigree represents the intercept),  $R^2$  is the  
160 conditional coefficient of determination, and  $Z$  and  $p$  values are presented for the effects of  
161 the genetic pedigree compared to the social pedigree.

162 **Table S3**

| <b>Response variable</b>     | <b>Pedigree</b> | <b>Mean (<math>\pm</math>SD)</b> | <b>Median (Range)</b> | <b><i>df</i></b> | <b><math>R^2</math></b> | <b>Estimate (<math>\pm</math>SE)</b> | <b><i>Z</i></b> | <b><i>p</i></b> |
|------------------------------|-----------------|----------------------------------|-----------------------|------------------|-------------------------|--------------------------------------|-----------------|-----------------|
| <b>Banded offspring</b>      |                 |                                  |                       |                  |                         |                                      |                 |                 |
| A) Number of females         | Social          | 1.8 (1.2)                        | 1 (1–7)               | 195              | 0.34                    | 0.51 (0.09)                          | 4.6             | <0.001          |
|                              | Genetic         | 2.8 (1.9)                        | 2 (2–11)              |                  |                         | 0.44 (0.10)                          |                 |                 |
| B) Prop <sub>Full-sibs</sub> | Social          | 0.75 (0.30)                      | 1.00 (0.17–1.00)      | 195              | 0.55                    | 1.63 (0.25)                          | 24.4            | <0.001          |
|                              | Genetic         | 0.58 (0.33)                      | 0.5 (0.00–1.00)       |                  |                         | -0.91 (0.04)                         |                 |                 |
| <b>Recruited offspring</b>   |                 |                                  |                       |                  |                         |                                      |                 |                 |
| C) Number of females         | Social          | 1.6 (0.8)                        | 1 (1–4)               | 59               | 0.05                    | 0.48 (0.14)                          | 1.7             | 0.10            |
|                              | Genetic         | 2.2 (1.2)                        | 2 (1–5)               |                  |                         | 0.31 (0.18)                          |                 |                 |
| D) Prop <sub>Full-sibs</sub> | Social          | 0.71 (0.38)                      | 1.00 (0.00–1.00)      | 59               | 0.61                    | 1.48 (0.50)                          | 6.2             | <0.001          |
|                              | Genetic         | 0.56 (0.39)                      | 0.36 (0.00–1.00)      |                  |                         | -1.17 (0.18)                         |                 |                 |

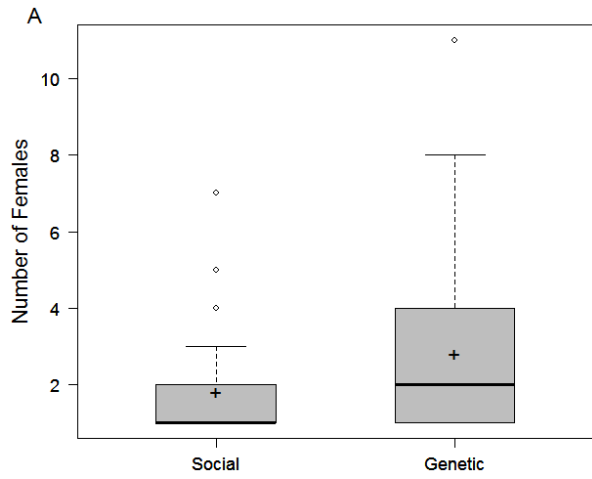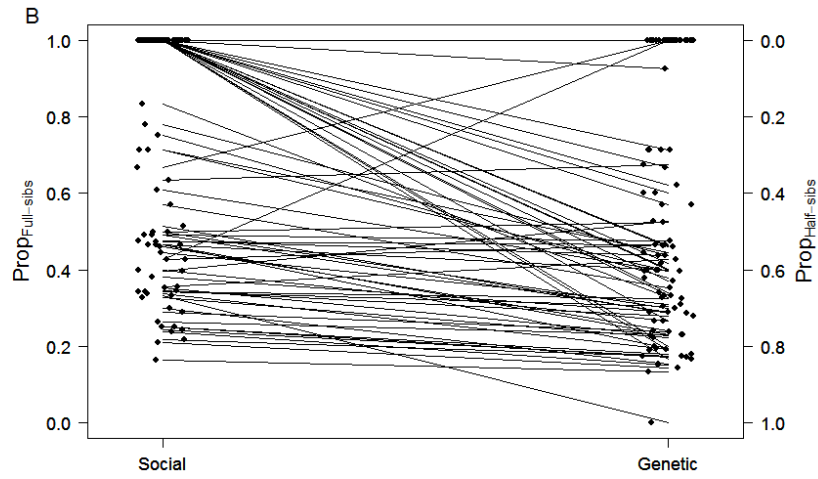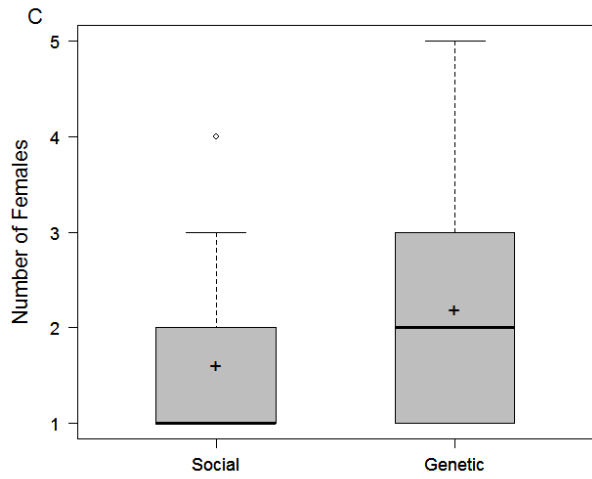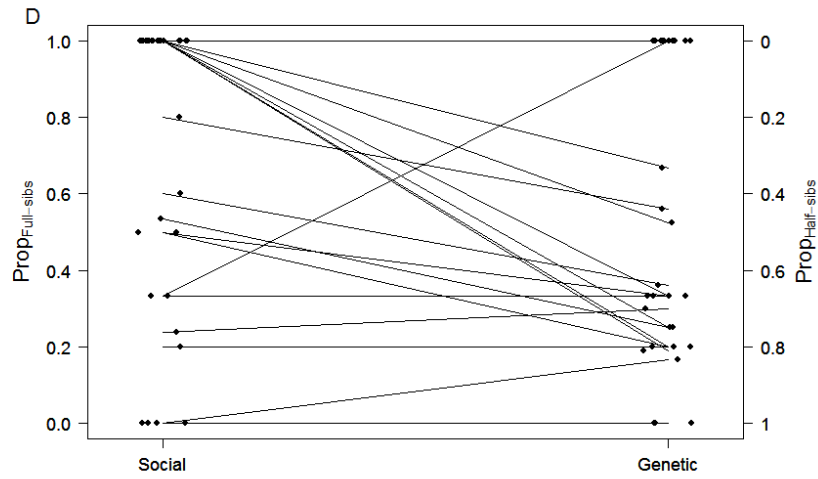

163

164 **Figure S2**

165 **Figure S2:** The numbers of different females with which male song sparrows produced (A)  
166 banded and (C) recruited offspring, and the sibship structures of males' (B) banded and (D)  
167 recruited offspring given the social pedigree ('Social') and genetic pedigree ('Genetic'). In (A)  
168 and (C), box lines represent the median, upper and lower quartiles, whiskers demarcate  
169  $1.5\times$  the interquartile range, and '+' shows the mean. In (B) and (D), the left and right axes  
170 respectively show the proportions of sibships among each male's offspring that are full-  
171 sibships ( $\text{Prop}_{\text{Full-sibs}}$ ) and half-sibships ( $\text{Prop}_{\text{Half-sibs}}$ ), where points denote individual males  
172 (jittered for clarity), and lines join observations for individual males given the two pedigrees.



173 **Supporting Information S4. Population-wide effects of polyandry on the distribution of**  
174 **relatedness**

175

176 To quantify the degree to which the observed individual-level differences in relationship  
177 frequencies extended across the population, we calculated the absolute and proportional  
178 changes in the total number of possible matings at each relationship level given the genetic  
179 versus social pedigrees. To do so, we pooled the number of possible matings among all  
180 females for a relationship level given the genetic pedigree and subtracted the number of  
181 possible matings at the same relationship level given the social pedigree.

182 Individual-level differences in the distribution of relatives that were available as  
183 possible mates given the genetic versus social pedigrees (*Results*, table 2) translated into  
184 substantial population-level differences; overall, extra-pair reproduction meant that females  
185 had more possible matings with half-brothers than with full-brothers, and with 4<sup>th</sup> degree  
186 relatives than with analogous 2<sup>nd</sup> and 3<sup>rd</sup> degree relatives (table S4).

187

188

189 **Table S4:** Total population-wide numbers of possible matings at 15 specified relationships,  
190 and with more distant relatives and unrelated individuals, given the social and genetic  
191 pedigrees. 'Difference' and 'proportional difference' show the decrease (negative values) or  
192 increase (positive values) in the absolute number and proportion of possible matings at  
193 each relationship level given the genetic versus social pedigrees. The absolute and  
194 proportional net total differences for each degree of relationship are also shown.

195 **Table S4**

| Relationship           |                          | Social pedigree | Genetic pedigree | Difference | Proportional difference |
|------------------------|--------------------------|-----------------|------------------|------------|-------------------------|
| 1 <sup>st</sup> degree | Father                   | 105             | 97               | -8         | -8%                     |
|                        | Full-brother             | 171             | 103              | -68        | -40%                    |
|                        | Son                      | 102             | 102              | 0          | +0%                     |
|                        | Net total                |                 |                  | -76        | -20%                    |
| 2 <sup>nd</sup> degree | Grandfather              | 46              | 40               | -6         | -13%                    |
|                        | Uncle                    | 89              | 44               | -45        | -51%                    |
|                        | Half-brother             | 109             | 290              | +181       | +166%                   |
|                        | Double first cousin      | 8               | 0                | -8         | -100%                   |
|                        | Nephew                   | 159             | 74               | -85        | -54%                    |
|                        | Grandson                 | 42              | 44               | +2         | +5%                     |
|                        | Net total                |                 |                  | +39        | +9%                     |
| 3 <sup>rd</sup> degree | Great-grandfather        | 19              | 17               | -2         | -11%                    |
|                        | Single first cousin      | 266             | 87               | -179       | -67%                    |
|                        | Great-grandson           | 12              | 14               | +2         | +17%                    |
|                        | Net total                |                 |                  | -179       | -60%                    |
| 4 <sup>th</sup> degree | Half-uncle               | 123             | 228              | +105       | +85%                    |
|                        | Half-single first cousin | 280             | 615              | +335       | +120%                   |
|                        | Half-nephew              | 226             | 322              | +96        | +43%                    |
|                        | Net total                |                 |                  | +536       | +85%                    |
| More distant           |                          | 5463            | 5143             | -320       | -6%                     |
| Unrelated              |                          | 808             | 808              | 0          | 0%                      |

197 **Supporting Information S5. Distribution of relatedness excluding all 1<sup>st</sup> degree relatives**

198

199 We repeated tests on the distribution of relatedness among possible mates given the social  
200 and genetic pedigrees to evaluate how our general conclusions apply to systems where  
201 individuals actively avoid close inbreeding with 1<sup>st</sup> degree relatives through social pairing or  
202 extra-pair reproduction. From our full ‘relatedness’ dataset (main manuscript), we removed  
203 all possible matings between females and their 1<sup>st</sup> degree relatives from both the social  
204 (father = 105, son = 102, full-sib = 171) and genetic (father = 23 additional, son = no  
205 additional, full-sib = 1 additional) pedigrees, resulting in a reduced sample size of 7626  
206 possible matings across eight years. We again quantified the effects of extra-pair  
207 reproduction on the distributions of relatedness with possible mates for individual females  
208 in this subset in two ways, similar to the main manuscript.

209 First, we calculated each female’s mean  $k_{SOC}$  and  $k_{GEN}$  with all possible mates that  
210 were 2<sup>nd</sup> degree relatives given the social pedigree and tested for differences between them  
211 using a Wilcoxon rank sum test. We repeated this process for all possible mates that were  
212 3<sup>rd</sup> and 4<sup>th</sup> degree relatives given the social pedigree, as well as for more distantly related  
213 and unrelated possible mates, to evaluate whether differences in  $k$  given the genetic rather  
214 than social pedigree were greater among females and their close or more distant social  
215 relatives when excluding all 1<sup>st</sup> degree social relatives. There was again substantial variation  
216 in mean kinship ( $k$ ) with possible mates that were 2<sup>nd</sup> degree social relatives (fig. S3A),  
217 similar to our main analyses (*Results*, fig. 5B). The majority of females (85% [83/98]) had  
218 lower mean  $k$  given the genetic pedigree for 2<sup>nd</sup> degree social relationships (fig. S3A), and  
219 individual mean  $k_{GEN}$  was significantly lower than mean  $k_{SOC}$  (table S5). There was again less

220 variation in  $k$  given both the social and genetic pedigrees for possible mates classified as 3<sup>rd</sup>  
221 and 4<sup>th</sup> degree social relatives, but 87% (68/78) and 77% (75/97) of females had lower mean  
222  $k$  given the genetic pedigree for both degrees of relationship given the social pedigree (fig.  
223 S3B,C), and mean  $k_{GEN}$  was significantly lower than mean  $k_{SOC}$  for both 3<sup>rd</sup> and 4<sup>th</sup> degree  
224 relationships given the social pedigree (table S5). The majority of females (68% [75/110])  
225 likewise had lower mean  $k$  given the genetic pedigree for more distant relatives (fig. S3D),  
226 but mean  $k_{SOC}$  and mean  $k_{GEN}$  did not differ substantially for this degree of relatedness given  
227 the social pedigree (table S5). Once again similar to our main analyses (*Results*, table 3; fig.  
228 5f), there was no difference in mean  $k$  for unrelated individuals between the two pedigrees  
229 (table S5; fig. S3E).

230         Second, to quantify continuous differences in  $k$  among individual females and their  
231 possible mates given the social and genetic pedigrees, we again calculated the difference in  
232  $k$  for each possible mating in this data subset as:  $k_{DIFF} = k_{GEN} - k_{SOC}$ , calculated mean  $k_{DIFF}$  for  
233 each individual female, and evaluated the proportion of females that experienced an  
234 increase, decrease, or no change in mean relatedness with all possible mates given the  
235 genetic pedigree versus the social pedigree. Mean  $k_{DIFF}$  among all possible matings for  
236 individual females in this subset was  $-0.006 \pm 0.01$  (median  $-0.006$ , range  $-0.033$ – $0.018$ ),  
237 indicating that, on average, females were less related to all possible mates given the genetic  
238 pedigree than given the social pedigree (fig. S4), similar to our main analyses.

239 Proportionally, 68% (77/114) of females had lower mean  $k_{DIFF}$  given the genetic pedigree,  
240 while 29% (33/114) of females had higher mean  $k_{DIFF}$ , and 4% (4/114) of females had no  
241 change in mean  $k_{DIFF}$  given the genetic versus social pedigrees (corresponding to immigrants  
242 breeding in only one season).

243 **Table S5:** Mean  $\pm$ SD (and range) of pairwise kinship given the social ( $k_{SOC}$ ) and genetic ( $k_{GEN}$ )  
 244 pedigrees between individual female song sparrows and all possible mates, excluding 1<sup>st</sup>  
 245 degree relatives, that were classified as 2<sup>nd</sup>, 3<sup>rd</sup>, and 4<sup>th</sup> degree relatives given the social  
 246 pedigree, as well as more distantly related and unrelated possible mates.  $n$  and ♀  
 247 respectively represent the numbers of possible matings and individual females in each  
 248 category. Mean difference denotes the mean decrease (negative values) or increase  
 249 (positive values) in mean kinship for individual females given the genetic pedigree.  $Z$  and  $p$   
 250 denote  $Z$  value of the Wilcoxon rank sum test statistic and associated  $p$  value. Degrees of  
 251 social relationships where mean  $k$  decreased significantly given the genetic pedigree rather  
 252 than the social pedigree are highlighted in bold.

253

| Relationship given social pedigree              | $k_{SOC}$                          | $k_{GEN}$                          | Mean difference                                             | $Z$ ( $p$ )                      |
|-------------------------------------------------|------------------------------------|------------------------------------|-------------------------------------------------------------|----------------------------------|
| 2 <sup>nd</sup> degree<br>( $n = 452$ , ♀ = 98) | 0.197 $\pm$ 0.033<br>(0.147–0.361) | 0.155 $\pm$ 0.038<br>(0.03–0.226)  | <b>-0.042<math>\pm</math>0.042</b><br><b>(-0.165–0.022)</b> | <b>7.3</b><br><b>(&lt;0.001)</b> |
| 3 <sup>rd</sup> degree<br>( $n = 296$ , ♀ = 78) | 0.145 $\pm$ 0.026<br>(0.094–0.255) | 0.112 $\pm$ 0.028<br>(0.057–0.198) | <b>-0.033<math>\pm</math>0.031</b><br><b>(-0.14–0.063)</b>  | <b>6.8</b><br><b>(&lt;0.001)</b> |
| 4 <sup>th</sup> degree<br>( $n = 624$ , ♀ = 97) | 0.125 $\pm$ 0.022<br>(0.084–0.174) | 0.106 $\pm$ 0.03<br>(0.031–0.168)  | <b>-0.019<math>\pm</math>0.023</b><br><b>(-0.099–0.023)</b> | <b>4.9</b><br><b>(&lt;0.001)</b> |
| More distant<br>( $n = 5446$ , ♀ = 110)         | 0.087 $\pm$ 0.017<br>(0.034–0.119) | 0.088 $\pm$ 0.018<br>(0.041–0.121) | -0.0002 $\pm$ 0.011<br>(-0.032–0.03)                        | 0.04<br>(0.97)                   |
| Unrelated<br>( $n = 808$ , ♀ = 114)             | 0.000 $\pm$ 0.000<br>--            | 0.000 $\pm$ 0.000<br>--            | 0.00 $\pm$ 0.00<br>--                                       | 0.0<br>(1.00)                    |

254

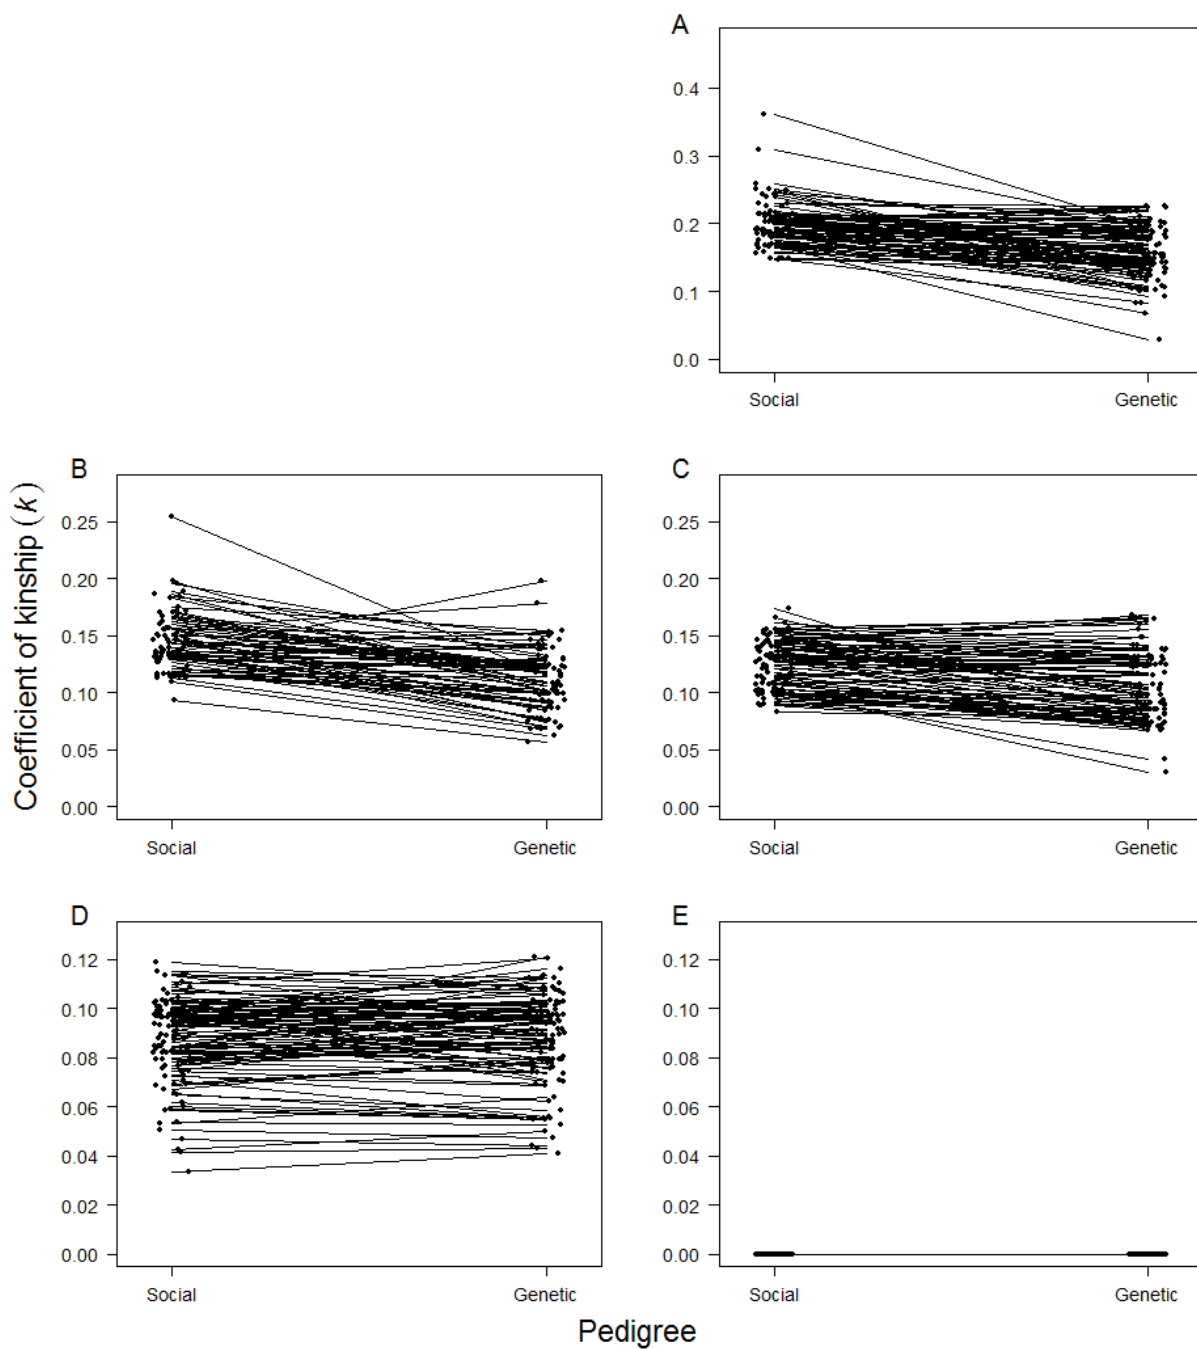

255

256 **Figure S3**

257 **Figure S3:** Mean coefficient of kinship ( $k$ ) given the social and genetic pedigrees for  
258 individual female song sparrows and all possible mates, excluding 1<sup>st</sup> degree relatives,  
259 classified as (A) 2<sup>nd</sup> degree, (B) 3<sup>rd</sup> degree, and (C) 4<sup>th</sup> degree relatives given the social  
260 pedigree, as well as (D) more distantly related, and (E) unrelated possible mates. Points  
261 denote individual females and are jittered for clarity, and lines join observations for  
262 individual females given the two pedigrees. Sample sizes for each category of relatedness  
263 are presented in table S5.

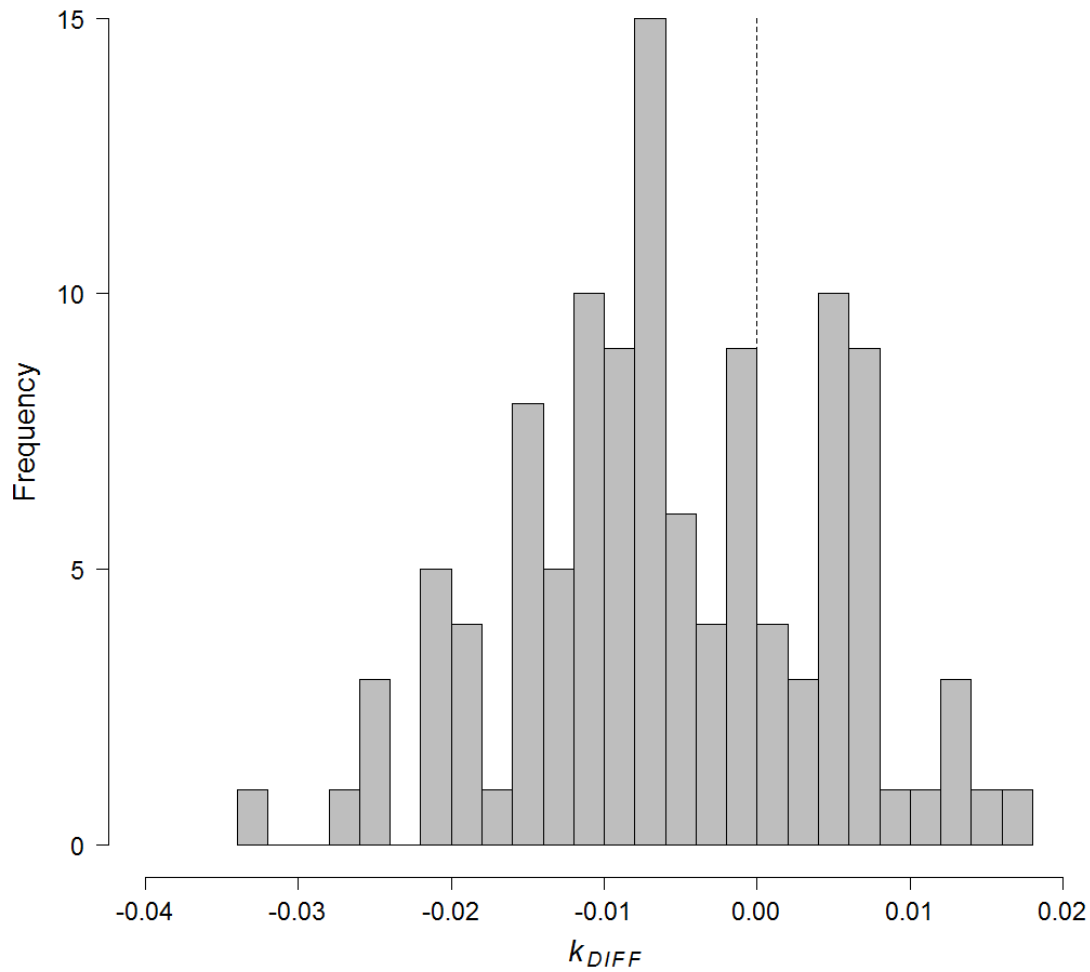

264

265 **Figure S4:** Distribution of the mean difference in coefficient of kinship ( $k_{DIFF}$ ) given the  
 266 genetic and social pedigrees ( $k_{GEN} - k_{SOC}$ ) among all possible matings for individual female  
 267 song sparrows, excluding those between 1<sup>st</sup> degree relatives. Dashed line demarcates  $k_{DIFF} =$   
 268 0, negative values indicate a lower mean  $k$  given the genetic pedigree.



269           Across all pooled possible matings for all females in this subset, results were again  
270 very similar to those from the full dataset (*Results*, fig. 6), such that the distributions of  $k_{GEN}$   
271 and  $k_{SOC}$  were significantly different (two-sample Anderson-Darling test,  $AD = 30.31$ ,  $T =$   
272  $38.50$ ,  $p < 0.001$ ), again based on resampling of each for 10,000 permutations (fig. S5).  
273 Specifically the distribution of  $k_{GEN}$  included fewer possible matings at higher  $k$  (fig. S5, black  
274 bars), but more possible matings at lower but non-zero  $k$  (fig. S5, white bars), and again no  
275 difference in the number of possible matings among unrelated individuals (i.e.,  $k = 0$ , fig.  
276 S5). Note that despite the removal of all first order relatives, kinship among some possible  
277 mates exceeded that between 1<sup>st</sup> degree relatives in an outbred population (i.e.,  $k = 0.25$ ,  
278 fig. S5).

279           Thus, results from analyses on this subset of possible matings were highly congruent  
280 with those presented throughout the main text (*Results*), indicating that our results and  
281 interpretations are likely applicable to systems where individuals avoid mating with 1<sup>st</sup>  
282 degree relatives (e.g., Stow and Sunnucks 2004; Gerlach and Lysiak 2006; Archie et al. 2007;  
283 Brouwer et al. 2011).

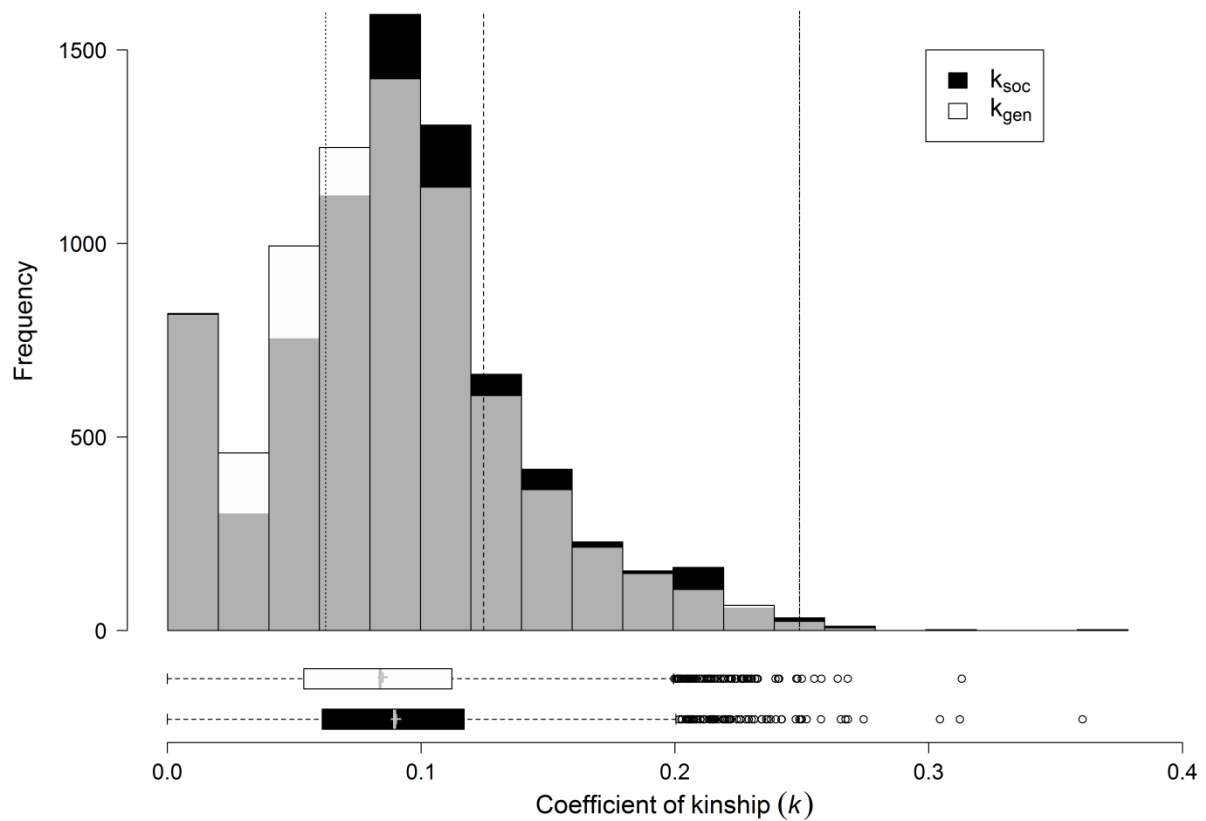

284

285 **Figure S5:** Overall distributions of pairwise coefficients of kinship across all possible song  
 286 sparrow matings excluding those between 1<sup>st</sup> degree relatives (female-father, female-son,  
 287 full-siblings), calculated from the social pedigree (black bars) and from the genetic pedigree  
 288 (white bars), where grey bars denote overlap between the two distributions. Dotted,  
 289 dashed, and dot-dashed lines are included for visualization and depict kinship values  
 290 equivalent to first cousin (0.0625), half-sib (0.125), and full-sib (0.25) matings, respectively.  
 291 Box plots further visualize the distribution in values of  $k$  given each pedigree, where box  
 292 lines represent the median, upper and lower quartiles, whiskers demarcate 1.5× the  
 293 interquartile range and '+' represents the mean. Mean  $k_{SOC}$  was  $0.090 \pm 0.05$  (range 0.00–  
 294 0.36) and mean  $k_{GEN}$  was  $0.085 \pm 0.05$  (range 0.00–0.31), again corresponding to a significant  
 295 (Wilcoxon signed rank test:  $Z = 17.30$ ,  $p < 0.001$ ) but relatively small decrease in mean  $k$   
 296 given the genetic versus social pedigrees for this restricted dataset.

297 ***Supporting Information S6. Distribution of relatedness within cohorts***

298

299 A potential limitation of our approach of comparing social and genetic pedigrees is that  
300 analyses of relationships and relatedness implicitly assume that all pairings (and hence  
301 assumed matings) that resulted in offspring in the social pedigree are the same as the  
302 matings that would have occurred if all ancestral social parents had been the true genetic  
303 parents of the offspring that they reared. This in turn requires that mating decisions are not  
304 affected by pedigree structure, which might imply an absence of active inbreeding  
305 preference or avoidance, and that recruitment and subsequent mating among females'  
306 descendants does not depend on paternity. Indeed, there is little evidence of active  
307 inbreeding avoidance (or preference) through social pairing or extra-pair reproduction in  
308 song sparrows (Reid et al. 2015), and no genetic correlation between female extra-pair  
309 reproductive rate and the subsequent survival (to recruitment) of her offspring (Reid 2012),  
310 but pre-reproductive mortality may differ somewhat between females' within-pair versus  
311 extra-pair offspring offspring (Sardell et al. 2011). To examine the potential implications of  
312 this assumption, we additionally quantified differences in  $k$  at the level of individual cohorts,  
313 where the social and genetic pedigrees differed only in the sires of individuals in that cohort,  
314 and not in previous years, to quantify the effects of extra-pair reproduction on the potential  
315 for inbreeding within that cohort. In doing so, we lose effects of polyandry on different  
316 degrees of relationships and relatedness in the population that are generated across  
317 multiple generations, but gain additional insight on the effects of polyandry within a single  
318 generation.

319 To quantify differences in  $k$  at the level of individual cohorts, we modified the social  
320 pedigree such that, beginning in ~1993, paternity was assigned to true genetic sires (i.e., a  
321 female's socially-paired or extra-pair male) up to year  $t-1$  (where  $t$  represents the year of  
322 hatching for the focal cohort) and to a female's socially-paired males in year  $t$ . We then  
323 calculated pairwise  $k$  from this modified social pedigree ( $k_{SOC\_cohort}$ ) for all possible matings  
324 of offspring produced in year  $t$  which survived to independence from parental care (~24  
325 days after hatching). We quantified differences in relatedness for independent offspring in  
326 year  $t$  rather than adults in year  $t+1$  to ensure adequate sample sizes for each cohort (mean  
327 =  $2577.5 \pm 1476.8$  possible cross-sex matings per cohort, range 1665–6048).

328 Because 'relationships' within each cohort are restricted to full- and half-sibs, single  
329 and half-single first cousins, and double first cousins (because all offspring are hatched in  
330 the same year) unlike our main analyses which incorporate overlapping generations, we  
331 binned values of pairwise  $k$  into six categories to evaluate whether differences in the  
332 number of possible matings given the genetic rather than modified social pedigree were  
333 greater among females and their closely (i.e., higher values of  $k$ ) or more distantly related  
334 (i.e., lower values of  $k$ ) possible mates. Categories of  $k$  were: (1)  $k \geq 0.25$ ; (2)  $0.125 \leq k <$   
335  $0.25$ ; (3)  $0.0625 \leq k < 0.125$ ; (4)  $0.0313 \leq k < 0.0625$ ; (5)  $0.00 < k < 0.0313$ ; and (6)  $k = 0$ ,  
336 where  $k = 0.25, 0.125, 0.0625, 0.0313$ , and  $0$  represent matings among outbred full-sibs,  
337 half-sibs, single first cousins, half-single first cousins, and unrelated individuals, respectively.  
338 There were fewer possible matings among close relatives (i.e.,  $k \geq 0.25$ ) and more possible  
339 matings among distant relatives (i.e.,  $0.00 < k < 0.03125$ ) given the genetic pedigree  
340 versus the modified social pedigree within cohorts (table S6). However, there was little  
341 change in the mean number of possible matings among pairs with intermediate levels of

342 kinship ( $0.03125 \leq k < 0.25$ ), and no change in the number of possible matings among  
343 unrelated pairs (table S6). We further evaluated the proportion of females that experienced  
344 an increase, decrease, or no change in the number of matings in each kinship category.  
345 Proportionally, ~38% of females had fewer possible matings at  $k \geq 0.25$  given the genetic  
346 pedigree versus the modified social pedigree across cohorts, but 57% of females  
347 experienced no change in the number of possible matings in this kinship category given the  
348 genetic pedigree (table S7). Higher proportions (~47% and 40%, respectively) of females  
349 experienced decreases in the number of matings at kinship levels greater than 0.0625 but  
350 less than 0.125 given the genetic pedigree, but more females experienced increases in the  
351 number of matings given the genetic pedigree at  $0.125 \leq k < 0.25$  and  $0.00 < k < 0.03125$   
352 (table S7). Thus, differences in ( $k_{SOC\_cohort}$ ) and ( $k_{GEN}$ ) within cohorts appear to be driven by  
353 fewer possible matings at  $k \leq 0.25$  and more possible matings at  $0.00 < k < 0.03125$ , leading  
354 to greater differences in  $k$  at these levels of kinship, whereas increases/decreases in the  
355 number of matings at intermediate levels cancel each other out, leading to smaller  
356 differences in mean  $k$  (table S6).

357 **Table S6:** Mean  $\pm$ SD (and range) of the number of possible matings independent (from  
 358 parental care) female song sparrows experienced with all independent males in their cohort  
 359 in six categories of pairwise kinship ( $k$ ) given a modified social pedigree ( $k_{SOC\_cohort}$ ) among  
 360 their parents, and given the genetic pedigree ( $k_{GEN}$ ). Mean difference denotes the mean  
 361 decrease (negative values) or increase (positive values) in the number of matings at each  
 362 kinship level given the genetic pedigree. Analyses include 391 individual females across  
 363 eight cohorts.  $Z$  and  $p$  denote  $Z$  value of the Wilcoxon rank sum test statistic and associated  
 364  $p$  value. Kinship categories where frequencies decreased or increased significantly given the  
 365 genetic pedigree rather than the social pedigree are highlighted in bold.

366

| Relatedness category      | $k_{SOC\_cohort}$           | $k_{GEN}$                   | Mean difference                                     | $Z$<br>( $p$ )                   |
|---------------------------|-----------------------------|-----------------------------|-----------------------------------------------------|----------------------------------|
| $k \geq 0.25$             | 2.00 $\pm$ 1.59<br>(0-7)    | 1.43 $\pm$ 1.44<br>(0-6)    | <b>-0.57 <math>\pm</math>1.21</b><br><b>(-6-3)</b>  | <b>5.3</b><br><b>(&lt;0.001)</b> |
| $0.125 \leq k < 0.25$     | 8.66 $\pm$ 7.30<br>(0-33)   | 9.38 $\pm$ 7.62<br>(0-37)   | +0.72 $\pm$ 4.51<br>(-22-26)                        | 1.4<br>(0.16)                    |
| $0.0625 \leq k < 0.125$   | 31.10 $\pm$ 14.16<br>(1-79) | 30.10 $\pm$ 13.60<br>(1-77) | -1.00 $\pm$ 6.76<br>(-57-24)                        | 0.8<br>(0.41)                    |
| $0.03125 \leq k < 0.0625$ | 9.86 $\pm$ 9.61<br>(0-55)   | 10.35 $\pm$ 10.28<br>(0-65) | +0.49 $\pm$ 6.28<br>(-23-55)                        | 0.1<br>(0.94)                    |
| $0.00 < k < 0.03125$      | 1.11 $\pm$ 2.47<br>(0-21)   | 1.47 $\pm$ 3.00<br>(0-23)   | <b>+0.36 <math>\pm</math>1.79</b><br><b>(-6-18)</b> | <b>2.6</b><br><b>(0.01)</b>      |
| $k = 0$                   | 0.00 $\pm$ 0.00<br>--       | 0.00 $\pm$ 0.00<br>--       | 0.00 $\pm$ 0.00<br>--                               | 0.0<br>(1.00)                    |

367

368 **Table S7:** Absolute and proportional (%) number of independent (from parental care)  
 369 female song sparrows that experienced a decrease, increase, or no change in the number of  
 370 possible matings with independent males in their cohort across six categories of pairwise  
 371 kinship ( $k$ ) given the genetic pedigree ( $k_{GEN}$ ) versus given the modified social pedigree  
 372 ( $k_{SOC\_cohort}$ ) among their parents. Analyses include 391 individual females across eight  
 373 cohorts.

374

| Relatedness category     | Decrease given<br>genetic pedigree | Increase given<br>genetic pedigree | No change      |
|--------------------------|------------------------------------|------------------------------------|----------------|
| $k \leq 0.25$            | 147<br>(37.6%)                     | 21<br>(5.4%)                       | 223<br>(57.0%) |
| $0.125 \leq k < 0.25$    | 109<br>(27.9%)                     | 191<br>(48.8%)                     | 91<br>(23.3%)  |
| $0.0625 \leq k < 0.125$  | 182<br>(46.6%)                     | 158<br>(40.4%)                     | 51<br>(13.0%)  |
| $0.0313 \leq k < 0.0625$ | 155<br>(39.6%)                     | 147<br>(37.6%)                     | 89<br>(22.8%)  |
| $0.00 < k < 0.03125$     | 22<br>(5.6%)                       | 81<br>(20.7%)                      | 288<br>(73.7%) |
| $k = 0$                  | 0<br>(0%)                          | 0<br>(0%)                          | 391<br>(100%)  |

375

376

**Literature cited**

377 Archie, E. A., J. A. Hollister-Smith, J. H. Poole, P. C. Lee, C. J. Moss, J. E. Maldonado, R. C.  
378 Fleischer, et al. 2007. Behavioural inbreeding avoidance in wild African elephants. *Molecular*  
379 *Ecology* 16:4138–4148.

380 Brouwer, L., M. Van De Pol, E. Atema, and A. Cockburn. 2011. Strategic promiscuity helps  
381 avoid inbreeding at multiple levels in a cooperative breeder where both sexes are  
382 philopatric. *Molecular Ecology* 20:4796–4807.

383 Gerlach, G., and N. Lysiak. 2006. Kin recognition and inbreeding avoidance in zebrafish,  
384 *Danio rerio*, is based on phenotype matching. *Animal Behaviour* 71:1371–1377.

385 Power, D. J., and L. Holman. 2014. Polyandrous females found fitter populations. *Journal of*  
386 *Evolutionary Biology* 27:1948–1955.

387 Reid. 2012. Predicting evolutionary responses to selection on polyandry in the wild: additive  
388 genetic covariances with female extra-pair reproduction. *Proceedings of the Royal Society of*  
389 *London B* 279:4652–4660.

390 Reid, J. M., P. Arcese, L. F. Keller, R. R. Germain, A. B. Duthie, S. Losdat, M. E. Wolak, et al.  
391 2015. Quantifying inbreeding avoidance through extra-pair reproduction. *Evolution* 69:59–  
392 74.

393 Sardell, R. J., P. Arcese, L. F. Keller, and J. M. Reid. 2011. Sex-specific differential survival of  
394 extra-pair and within-pair offspring in song sparrows, *Melospiza melodia*. *Proceedings of the*  
395 *Royal Society of London B* 278:3251–3259.

396 Stow, A. J., and P. Sunnucks. 2004. Inbreeding avoidance in Cunningham's skinks (*Egernia*  
397 *cunninghami*) in natural and fragmented habitat. *Molecular Ecology* 13:443–447.

398
